# Supplementary material
Source: PubMed Central journal article supplement (PMC3085006)
Supplement: NIHMS264479-supplement-supplement_1.pdf [file NIHMS264479-supplement-supplement_1.pdf]

Supplemental Figure 1. No significant difference was detected in mouse body weight, a surrogate marker of toxicity, between control and sirolimus-treated mice.
